# Supplementary material for: Ratiometric imaging of lysosomal hypochlorous acid enabled by FRET-based polymer dots
Source: Royal Society of Chemistry journal article supplement (doi:10.1039/c7py01289f), 2017-01-01
Supplement: c7py01289f1.pdf [file c7py01289f1.pdf]

**Electronic Supplementary Information**

**Ratiometric imaging of lysosomal hypochloric acid enabled  
by FRET-based polymer dots**

Hong Wang, Peisheng Zhang,\* Yongxiang Hong, Bin Zhao, Pinggui Yi and Jian Chen\*

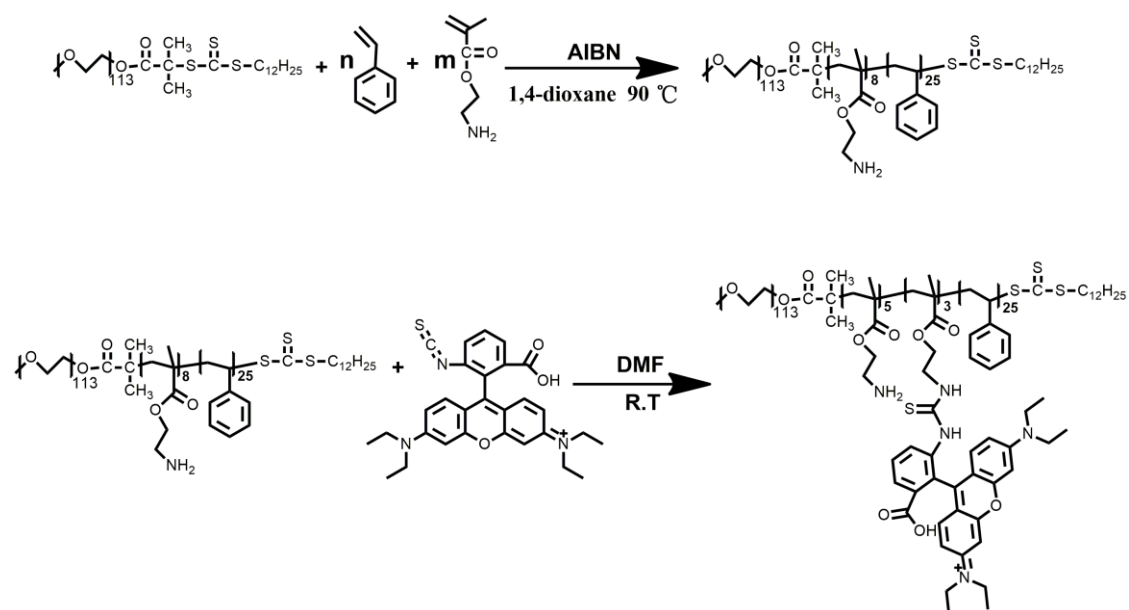

**Scheme S1.** Synthetic route of the probe  $\text{PEO}_{113}\text{-}b\text{-P(AEMH}_5\text{-co-AEMR}_3\text{-co-St}_{25})$ .

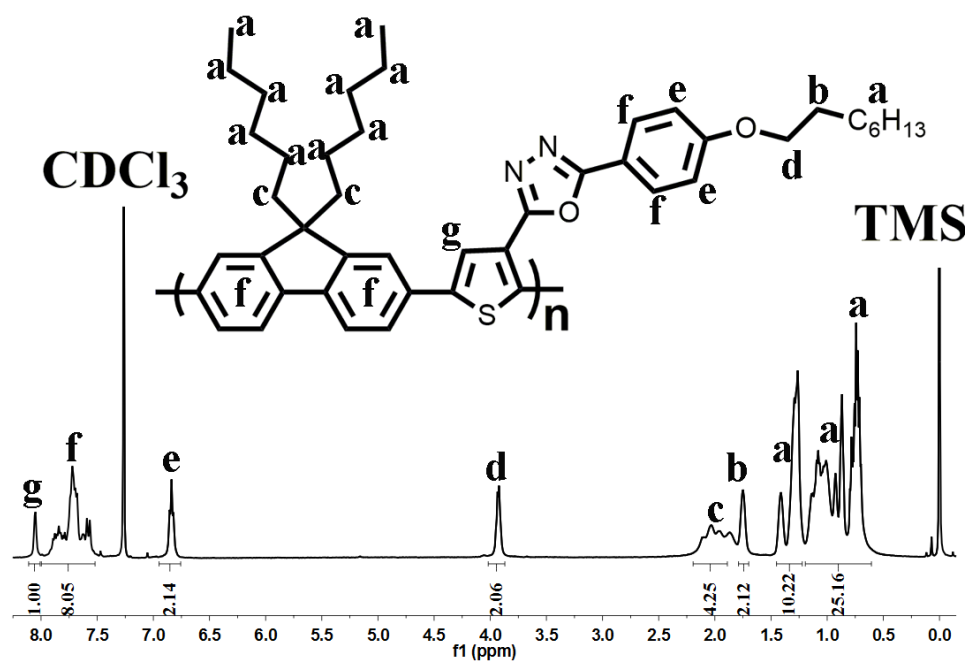

Figure S1. <sup>1</sup>H-NMR spectrum (in CDCl<sub>3</sub>) of PTPO.

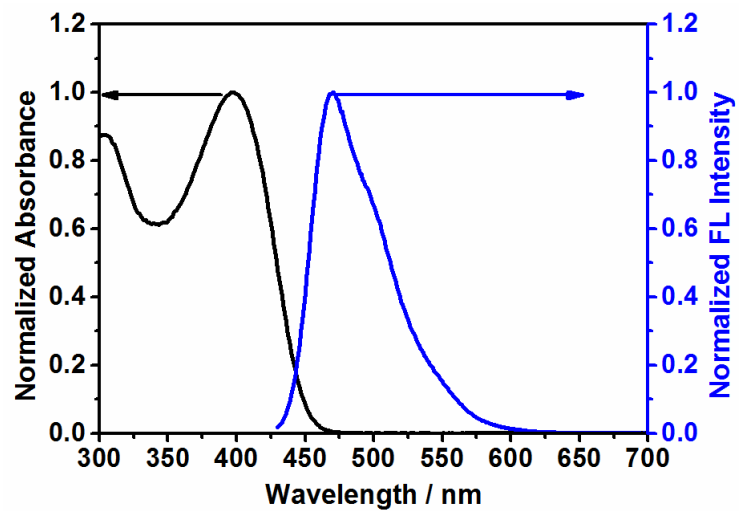

**Figure S2.** Normalized absorption and fluorescence emission spectra of **FPD** (FPD-1) in pH 5.0 PBS buffered water.

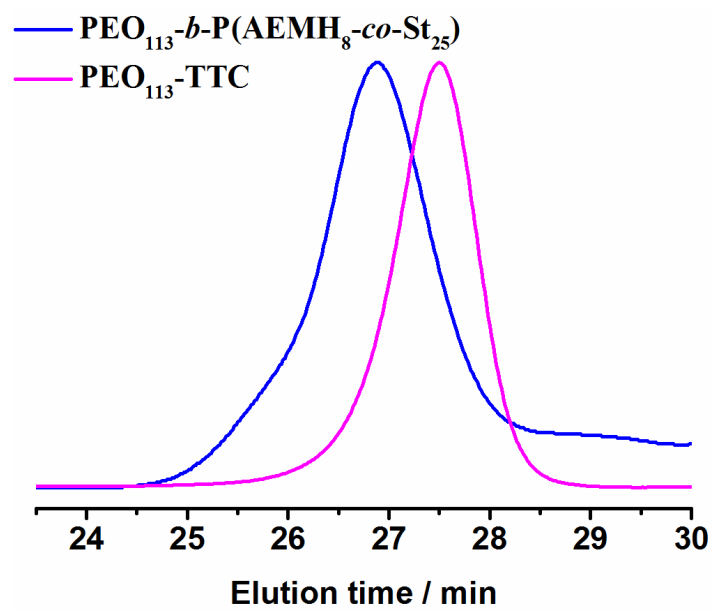

**Figure S3.** GPC trace of  $\text{PEO}_{113}\text{-TTC}$ ,  $\text{PEO}_{113}\text{-}b\text{-P(AEMH}_8\text{-}co\text{-St}_{25})$

**Table S1.** Molecular weight distribution data of starting linear polymers.

| Sample                                                                             | $M_{n, \text{GPC}}^a$ | $M_{w, \text{GPC}}^a$ | PDI  |
|------------------------------------------------------------------------------------|-----------------------|-----------------------|------|
| PEO <sub>113</sub> -TTC                                                            | 8457                  | 8944                  | 1.06 |
| PEO <sub>113</sub> - <i>b</i> -P(AEMH <sub>8</sub> - <i>co</i> -St <sub>25</sub> ) | 12141                 | 13741                 | 1.12 |

<sup>a</sup>The data were acquired using SEC based on a polystyrene calibration curve and obtained from GPC analysis was using THF as eluent at a flow rate of 1.0 mL/min.

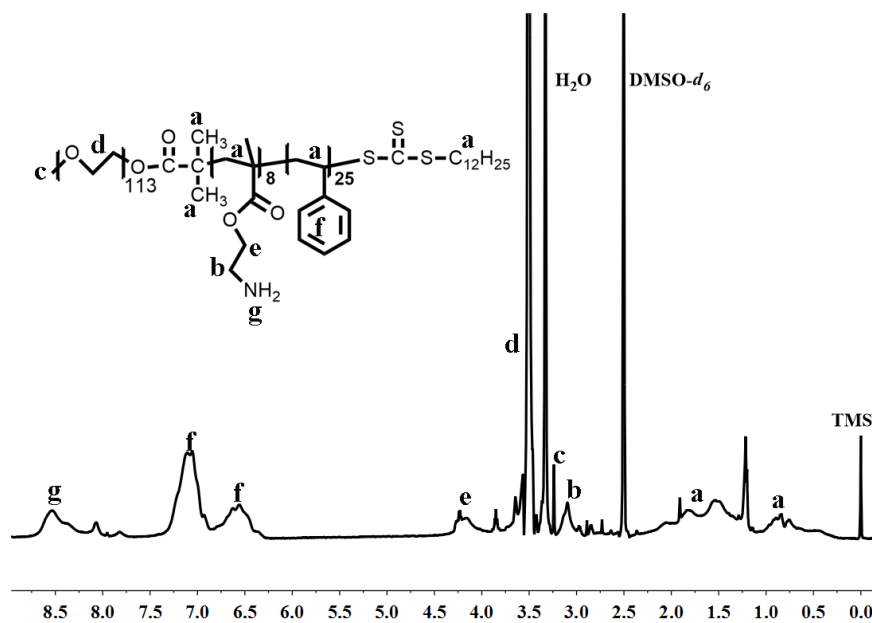

**Figure S4.**  $^1\text{H-NMR}$  spectrum (in  $\text{d}_6\text{-DMSO}$ ) of  $\text{PEO}_{113}\text{-}b\text{-P(AEMH}_8\text{-}co\text{-St}_{25})$ .

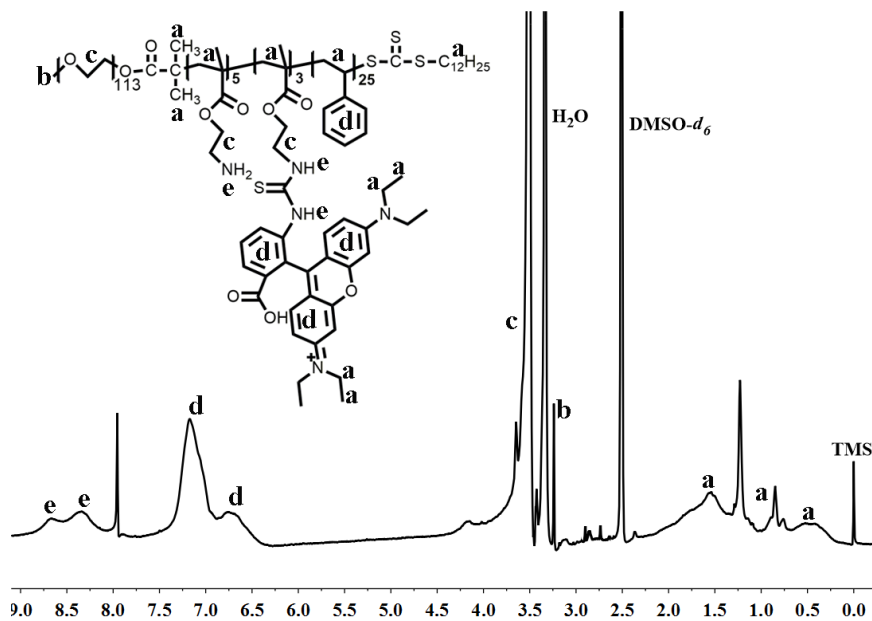

**Figure S5.**  $^1\text{H-NMR}$  spectrum (in  $\text{d}_6\text{-DMSO}$ ) of  $\text{PEO}_{113}\text{-}b\text{-P}(\text{AEMH}_5\text{-}co\text{-AEMR}_3\text{-}co\text{-St}_{25})$ .



**Table S2.** List of some data and parameters for two dye-incorporated nanoparticle samples

| Sample <sup>a</sup> | Dye feed                                      |                        | Dye feed                                      |                        | Size <sup>d</sup><br>(nm) | Zeta<br>Potential <sup>e</sup> |
|---------------------|-----------------------------------------------|------------------------|-----------------------------------------------|------------------------|---------------------------|--------------------------------|
|                     | [10 <sup>-2</sup> mg (×10 <sup>-9</sup> mol)] |                        | [10 <sup>-2</sup> mg (×10 <sup>-7</sup> mol)] |                        |                           |                                |
|                     | PTPO                                          | Determind <sup>b</sup> | RHB                                           | Determind <sup>c</sup> |                           |                                |
| FPD-0               | 0                                             | 0                      | 0                                             | 0                      | 31                        | 7.2                            |
| FPD-1               | 12.00 (8.00)                                  | 11.13 (7.42)           | 0                                             | 0                      | 27                        | 7.8                            |
| FPD-2               | 0                                             | 0                      | 14.20 (2.97)                                  | 13.34 (2.78)           | 35                        | 4.8                            |
| FPD-3               | 12.00 (8.00)                                  | 11.32 (7.54)           | 14.20 (2.97)                                  | 13.55 (2.83)           | 29                        | 5.6                            |

<sup>a</sup>The PEO<sub>113</sub>-*b*-P(AEMH<sub>5</sub>-*co*-AEMR<sub>3</sub>-*co*-St<sub>25</sub>) or PEO<sub>113</sub>-*b*-P(AEMH<sub>8</sub>-*co*-St<sub>25</sub>) feed is 1.2 mg, the PTPO feed is 0.12 mg, H<sub>2</sub>O feed is 10 mL;

<sup>b</sup>Calculated by using the absorbance of PTPO at 395 nm in nanoparticle dispersion (eliminate the effect of scattering light) and the molar extinction coefficient of PTPO in dichloromethane, ( $\epsilon = 890700 \text{ mol}^{-1} \cdot \text{L} \cdot \text{cm}^{-1}$ );

<sup>c</sup>Calculated by using the absorbance of RHB at 554 nm in nanoparticle dispersion (eliminate the effect of scattering light) and the molar extinction coefficient of RHB in water (pH 5.0), ( $\epsilon = 48000 \text{ mol}^{-1} \cdot \text{L} \cdot \text{cm}^{-1}$ );

<sup>d</sup>Average diameter of nanoparticles were determined from DLS data;

<sup>e</sup>Zeta potential of nanoparticles were determined from DLS data.

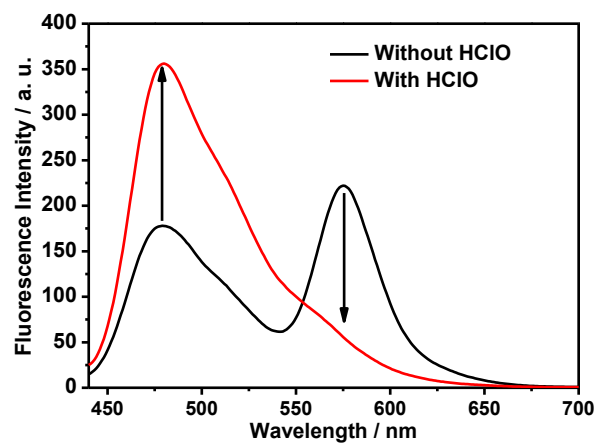

**Figure S6.** Fluorescence spectra of **FPD** (FPD-3, 12 μg/mL) in pH 5.0 PBS buffered water without and with HClO (7.0 μM,  $\lambda_{\text{ex}} = 420$  nm).

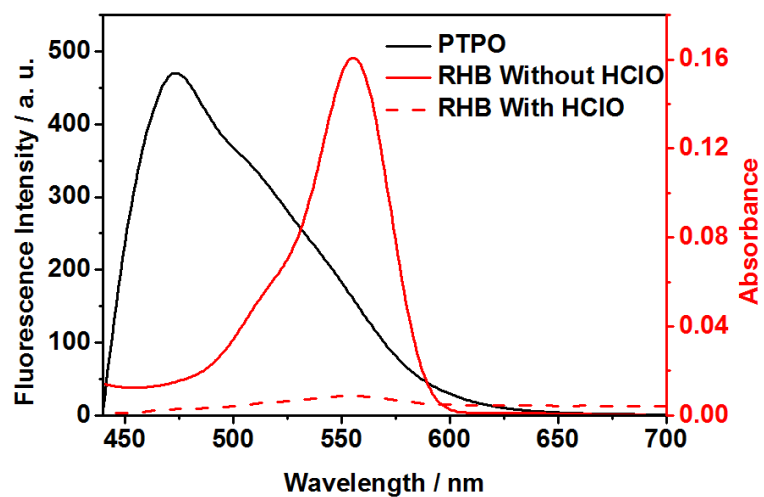

**Figure S7.** Fluorescence emission spectrum of FPD (FPD-1, black solid curve) and absorption spectrum of FPD (FPD-2) without (red solid curve) and with HClO (red dash curve) in pH 5.0 PBS buffered water.

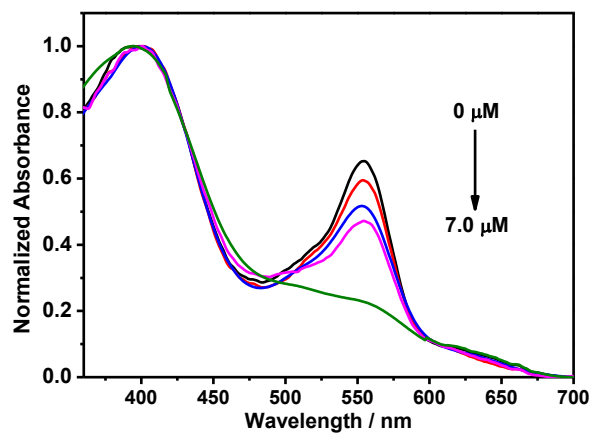

**Figure S8.** Normalized absorbance spectra of **FPD** (FPD-3, 12  $\mu\text{g/mL}$ ) under different concentration of  $\text{HClO}$  (0, 1.0, 2.0, 3.0, 7.0  $\mu\text{M}$ ) (pH = 5.0, buffered solution).

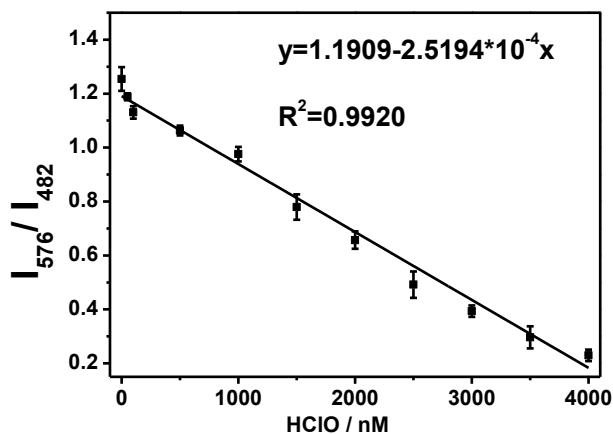

**Figure S9.** The ratiometric fluorescence intensity ( $I_{576}/I_{482}$ ) versus HClO concentration (0-4000 nM).

Determination of the detection limit:

Fluorescence:

First the calibration curve was obtained from the plot of ratio fluorescence intensity ( $I_{576}/I_{482}$ ) as a function of HClO concentration. The regression curve equation was then obtained for the lower concentration part.

$$\text{The detection limit} = 3 \times \sigma_{bi} / m$$

where  $m$  is the slope of the curve equation, and  $\sigma_{bi}$  represents the standard deviation for the fluorescence ratiometric intensity ( $I_{576}/I_{482}$ ) of **FPD** (FPD-3) in the absence of HClO.

$$I_{576} / I_{482} = 1.1575 - 2.5194 \times 10^{-4} \times [\text{HClO}]$$

$$\text{LOD} = 3 \times 0.00043 / (2.5194 \times 10^{-4}) = 5.1 \text{ nM.}$$

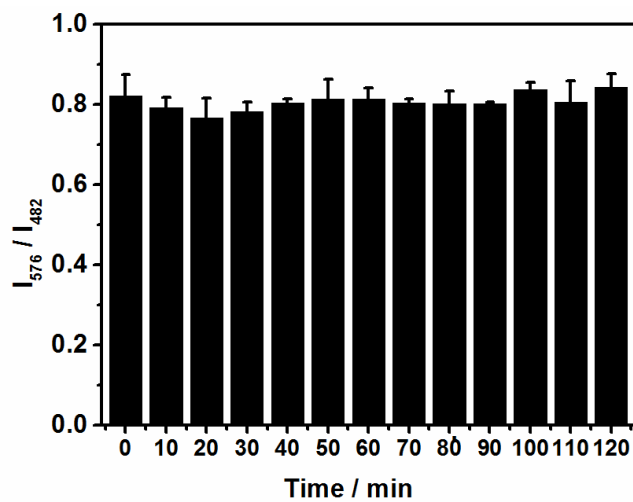

**Figure S10.** Fluorescence intensity changes ( $I_{482}/I_{576}$ ) of **FPD** (FPD-3, 12  $\mu\text{g}/\text{mL}$ ) under a continuous 365 nm UV lamp irradiation ( $2.8 \text{ mW}/\text{cm}^2$ ).

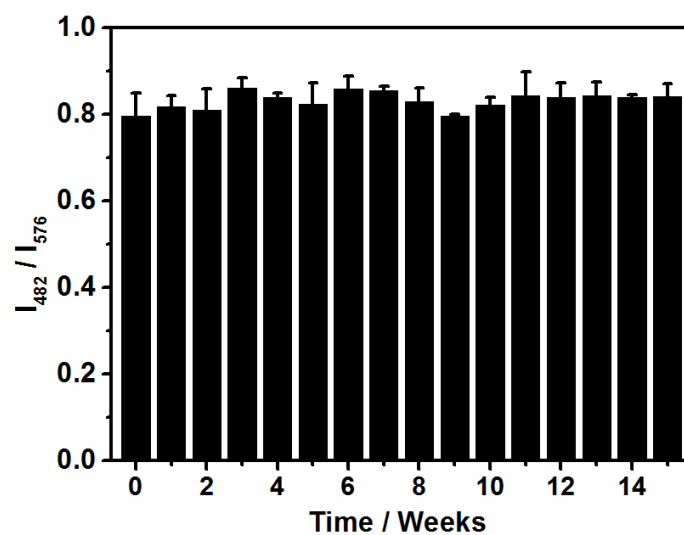

**Figure S11.** Fluorescence long-term photostability of FPD (FPD-3, 12  $\mu\text{g/mL}$ ) under ambient temperature and kept in the dark.

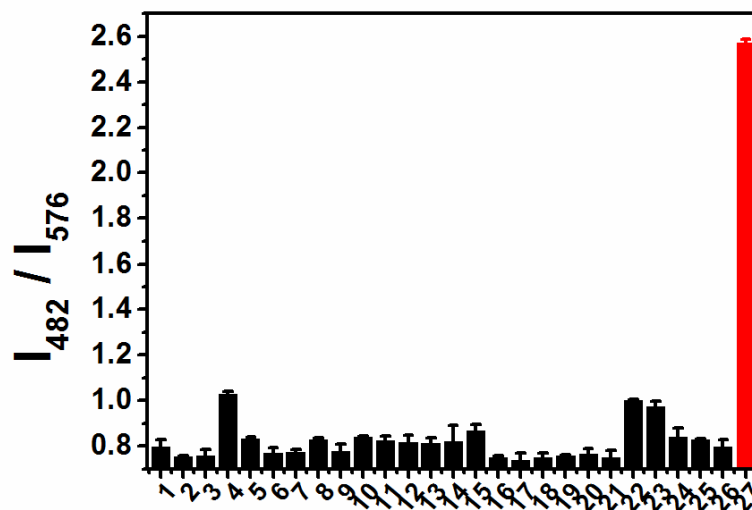

**Figure S12.** The ratiometric fluorescence intensity ( $I_{576}/I_{482}$ ) response of FPD (FPD-3, 12  $\mu\text{g}/\text{mL}$ ) toward various analytes (50  $\mu\text{M}$  for other). (1) blank, (2)  $Zn^{2+}$ , (3)  $Mg^{2+}$ , (4)  $Fe^{3+}$ , (5)  $Ni^{2+}$ , (6)  $Co^{2+}$ , (7)  $Hg^{2+}$ , (8)  $Ag^+$ , (9)  $Ca^{2+}$ , (10)  $Fe^{2+}$ , (11) GSH, (12) Hcy, (13) Cys, (14)  $S^{2-}$ , (15)  $SO_3^{2-}$ , (16)  $NO_2^-$ , (17)  $NO_3^-$ , (18)  $HSO_4^{2-}$ , (19)  $SO_4^{2-}$ , (20)  $HPO_4^{2-}$ , (21)  $H_2PO_4^-$ , (22)  $HO\cdot$ , (23)  $t-BuO\cdot$ , (24)  $^1O_2$ , (25)  $H_2O_2$ , (26)  $t-BuOOH$ , (27)  $HClO$  (3  $\mu\text{M}$ ).



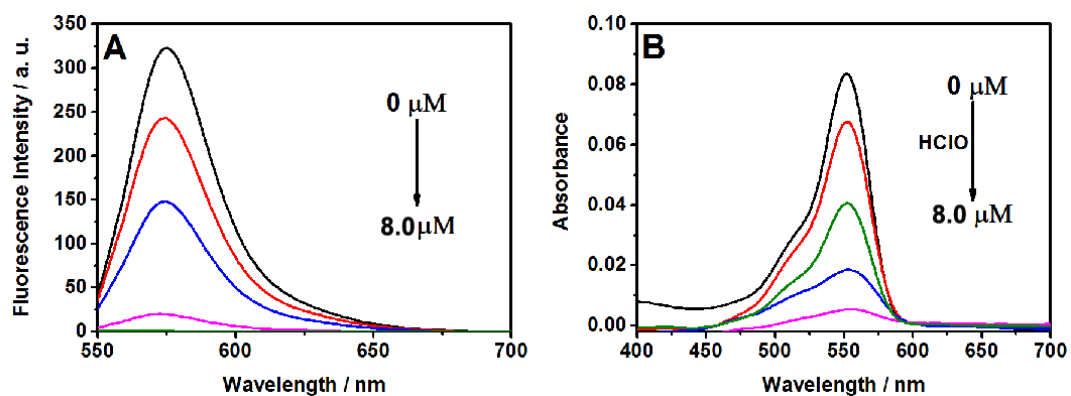

**Figure S13.** (A) Fluorescence spectra of RHB (2  $\mu\text{M}$ ) in pH 5.0 PBS buffered water in the presence of different concentration of HClO (0  $\mu\text{M}$ , 1.0  $\mu\text{M}$ , 2.0  $\mu\text{M}$ , 4.0  $\mu\text{M}$ , 8.0  $\mu\text{M}$ ). (B) The absorbance spectra of RHB (2.0  $\mu\text{M}$ ) in pH 5.0 PBS buffered water in the presence of different concentration of HClO (0  $\mu\text{M}$ , 1.0  $\mu\text{M}$ , 2.0  $\mu\text{M}$ , 4.0  $\mu\text{M}$ , 8.0  $\mu\text{M}$ );

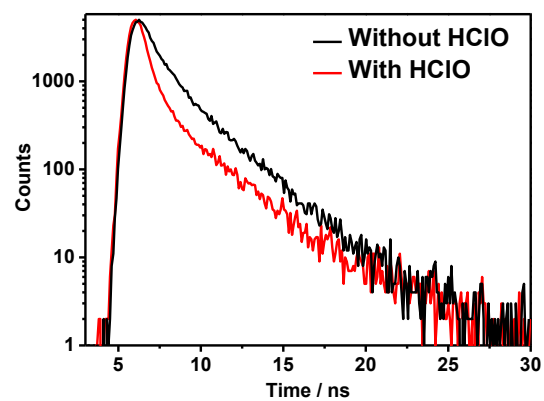

**Figure S14.** Fluorescence decay curves of RHB ( $2 \mu\text{M}$ ) at 576 nm in pH 5.0 PBS buffered water without and with HClO ( $8.0 \mu\text{M}$ ).

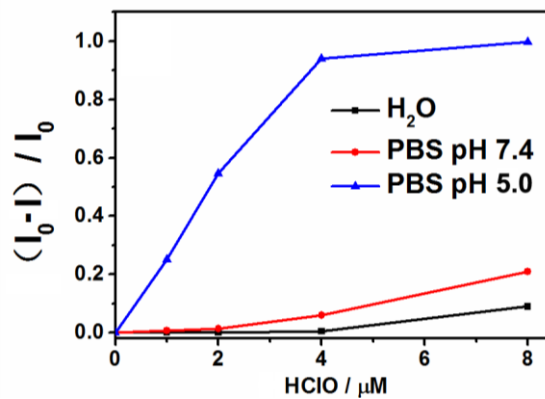

(A)

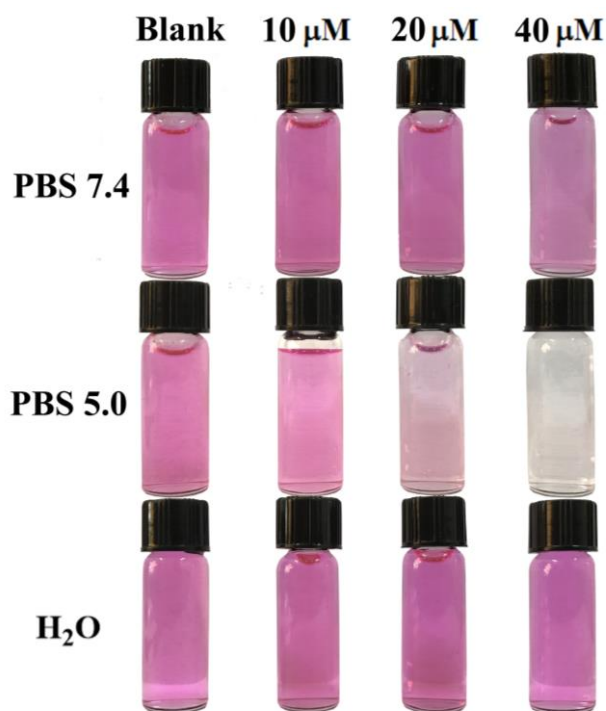

(B)

**Figure S15.** (A) The fluorescence change  $((I-I_0)/I_0)$  of RHB ( $2 \mu\text{M}$ ) at  $576 \text{ nm}$  in different environment versus HClO concentration ( $0-8.0 \mu\text{M}$ ) ( $I_0$  indicates the fluorescence of free RHB and  $I$  indicates the fluorescence of RHB after introduction of corresponding concentration HClO). (B) The color changes of RHB ( $20 \mu\text{M}$ ) in the presence of different concentration HClO under different aqueous solution containing PBS ( $10 \text{ mM}$ ,  $\text{pH} = 7.4$  and  $\text{pH} = 5.0$ ) and water.

**Note:** In order to clearly visualize the experimental results of the Figure S15B, the concentration of RHB and HClO have been enlarged ten times than native concentration.

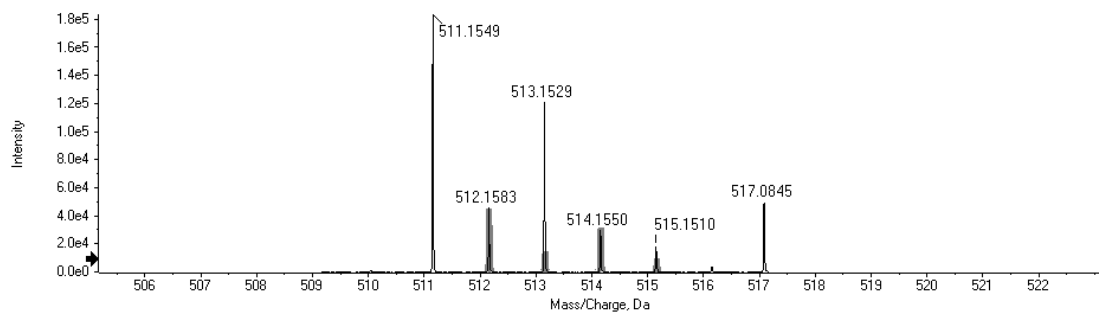

**Figure S16.** Mass spectrum of **RHB-HClO**. MS(ESI):  $m/z$  511.1549  $[M+H]^+$ .

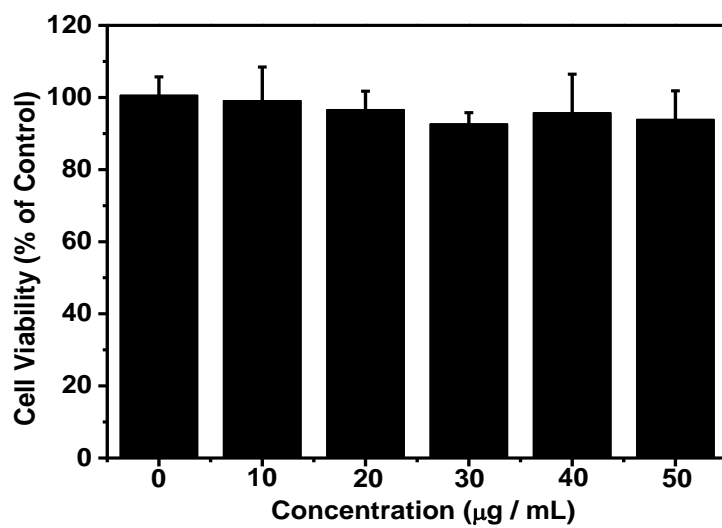

**Figure S17.** Cell viability for HeLa cells in the presence of the probe **FPD** (FPD-3) at varied concentrations. The results are the mean standard deviation of eight separate measurements.

**Table S3.** Comparison of the recently reported HClO fluorescent probes

| Probe                 | Method                     | Detection limit/nM | Reaction time       | Solution                                            | Imaging application of lysosome |
|-----------------------|----------------------------|--------------------|---------------------|-----------------------------------------------------|---------------------------------|
| Hypo-SiF <sup>1</sup> | Turn-on<br>Fluorescent     | --                 | within<br>80 s      | PBS (pH 7.4, 0.5%<br>DMF)                           | --                              |
| TP-HOCl <sup>2</sup>  | Turn-on<br>Fluorescent     | 16.6               | within<br>seconds   | PBS (pH 7.4,<br>50% EtOH)                           | lysosome                        |
| NR <sup>3</sup>       | Ratiometric                | 14.5               | within<br>seconds   | PBS (pH 5.0,<br>30% EtOH)                           | lysosome                        |
| Ir-Fc <sup>4</sup>    | Turn-on<br>Fluorescent     | 93.3               | within<br>seconds   | PBS (pH 7.4,<br>50% EtOH)                           | --                              |
| NR-HOCl <sup>5</sup>  | Turn-on<br>Fluorescent     | --                 | within<br>seconds   | PBS (pH 7.4,<br>1 % EtOH)                           | --                              |
| HcSe <sup>6</sup>     | Turn-on<br>Fluorescent     | 7.98               | within<br>2 min     | PBS (pH 7.4, 1 %<br>CH <sub>3</sub> CN)             | --                              |
| Lyso-1 <sup>7</sup>   | Turn-on<br>Fluorescent     | 60                 | within<br>5 min     | PBS (pH 7.4, 10 %<br>EtOH)                          | lysosome                        |
| HKOCl-3 <sup>8</sup>  | Turn-on<br>Fluorescent     | 0.33               | within<br>1 min     | PBS (pH 7.4, 0.1 %<br>DMF)                          | lysosome                        |
| Ptz-AO <sup>9</sup>   | Turn-on<br>Fluorescent     | 2.7                | within<br>5 seconds | PBS (pH 5.0)                                        | --                              |
| Naph-Rh <sup>10</sup> | Ratiometric<br>Fluorescent | 100                | within<br>seconds   | PBS (pH 6, 30%<br>EtOH))                            | --                              |
| PMN-TPP <sup>11</sup> | Ratiometric<br>Fluorescent | 430                | within<br>seconds   | PBS (pH 7.4, 0.5%<br>DMSO and 1 mM<br>Triton X-100) | --                              |
| BFCIO <sup>12</sup> , | Ratiometric<br>Fluorescent | 10.6               | within<br>10 s      | PBS (pH 7.4, 50%<br>EtOH))                          | lysosome                        |
| Ru-Fc <sup>13</sup>   | Turn-on<br>Fluorescent     | 38.6               | within<br>seconds   | PBS (pH 7.4, 25%<br>EtOH))                          | lysosome                        |
| Lyso-HA <sup>14</sup> | Ratiometric<br>Fluorescent | 110                | within<br>seconds   | PBS (pH 7.4, 30%<br>DMSO)                           | lysosome                        |

|           |                            |     |                |              |          |
|-----------|----------------------------|-----|----------------|--------------|----------|
| This work | Ratiometric<br>Fluorescent | 5.1 | within<br>30 s | PBS (pH 5.0) | lysosome |
|-----------|----------------------------|-----|----------------|--------------|----------|

- Best, Q. A., Sattenapally, N., Dyer, D. J., Scott, C. N., McCarroll, M. E. (2013). pH-dependent Si-fluorescein hypochlorous acid fluorescent probe: spirocycle ring-opening and excess hypochlorous acid-induced chlorination. *J. Am. Chem. Soc.*, 135(36), 13365-13370.
- Yuan, L., Wang, L., Agrawalla, B. K., Park, S. J., Zhu, H., Sivaraman, B., Peng, J., Xu, Q. H., Chang, Y. T. (2015). Development of targetable two-photon fluorescent probes to image hypochlorous acid in mitochondria and lysosome in live cell and inflamed mouse model. *J. Am. Chem. Soc.*, 137(18), 5930-5938.
- Shen, S. L., Ning, J. Y., Zhang, X. F., Miao, J. Y., Zhao, B. X. (2017). Through-bond energy transfer-based ratiometric fluorescent probe for the imaging of HOCl in living cells. *Sens. Actuators. B*, 244, 907-913.
- Zhang, F., Liang, X., Zhang, W., Wang, Y. L., Wang, H., Mohammed, Y. H., Song, B., Zhang, R., Yuan, J. (2017). A unique iridium (III) complex-based chemosensor for multi-signal detection and multi-channel imaging of hypochlorous acid in liver injury. *Biosens. Bioelectron.*, 87, 1005-1011.
- Zhou, X., Lai, R., Beck, J. R., Li, H., Stains, C. I. (2016). Nebraska Red: a phosphinate-based near-infrared fluorophore scaffold for chemical biology applications. *Chem. Commun.*, 52(83), 12290-12293.
- Liu, S. R., Wu, S. P. (2013). Hypochlorous acid turn-on fluorescent probe based on oxidation of diphenyl selenide. *Org. Lett.*, 15(4), 878-881.
- Jiao, X., Liu, C., Wang, Q., Huang, K., He, S., Zhao, L., Zeng, X. (2017). Fluorescence probe for hypochlorous acid in water and its applications for highly lysosome-targetable live cell imaging. *Anal. Chim. Acta*, 969, 49-56.
- Hu, J. J., Wong, N. K., Lu, M. Y., Chen, X., Ye, S., Zhao, A. Q., Yang, D. (2016). HKOCl-3: a fluorescent hypochlorous acid probe for live-cell and in vivo imaging and quantitative application in flow cytometry and a 96-well microplate assay. *Chem. Sci.*, 7(3), 2094-2099.
- Liang, L., Liu, C., Jiao, X., Zhao, L., Zeng, X. (2016). A highly selective and sensitive photoinduced electron transfer (PET) based HOCl fluorescent probe in water and its endogenous imaging in living cells. *Chem. Commun.*, 52(51), 7982-7985.
- Zhang, Y. R., Meng, N., Miao, J. Y., Zhao, B. X. (2015). A Ratiometric Fluorescent Probe Based on a Through-Bond Energy Transfer (TBET) System for Imaging HOCl in Living Cells. *Chem. Eur. J.*, 21(52), 19058-19063.
- Huang, Y., Zhang, P., Gao, M., Zeng, F., Qin, A., Wu, S., Tang, B. Z. (2016). Ratiometric detection and imaging of endogenous hypochlorite in live cells and in vivo achieved by using an aggregation induced emission (AIE)-based nanoprobe. *Chem. Commun.*, 52(45), 7288-7291.
- Zhang, Z.; Fan, J.; Cheng, G.; Ghazali, S.; Du, J.; Peng, X., Fluorescence completely separated ratiometric probe for HClO in lysosomes. *Sens Actuators B* 2017, 246, 293-299.
- Cao, L.; Zhang, R.; Zhang, W.; Du, Z.; Liu, C.; Ye, Z.; Song, B.; Yuan, J., A

ruthenium(II) complex-based lysosome-targetable multisignal chemosensor for in vivo detection of hypochlorous acid. *Biomaterials*, 2015, 68, 21-31.

14. Ren, M.; Deng, B.; Zhou, K.; Kong, X.; Wang, J.-Y.; Xu, G.; Lin, W., A lysosome-targeted and ratiometric fluorescent probe for imaging exogenous and endogenous hypochlorous acid in living cells. *J Mater Chem B* 2016, 4 (27), 4739-4745.
